# Supplementary material for: The interaction between intratumoral bacteria and metabolic distortion in hepatocellular carcinoma
Source: Springer Nature journal article supplement (doi:10.1186/s12967-024-05036-7), 2024-03-04
Supplement: MOESM1 [file 26811110]

## **Supplemental file for**

### **The interaction between intratumoral bacteria and metabolic distortion in hepatocellular carcinoma**

Chen Xue<sup>a†</sup>, Xinyu Gu<sup>b†</sup>, Qingmiao Shi<sup>a†</sup>, Xiao Ma<sup>a</sup>, Junjun Jia<sup>c</sup>, Yuanshuai Su<sup>a</sup>, Zhengyi Bao<sup>a</sup>, Juan Lu<sup>a\*</sup>, Lanjuan Li<sup>a\*</sup>

<sup>a</sup> State Key Laboratory for Diagnosis and Treatment of Infectious Diseases, National Clinical Research Center for Infectious Diseases, National Medical Center for Infectious Diseases, Collaborative Innovation Center for Diagnosis and Treatment of Infectious Diseases, The First Affiliated Hospital, Zhejiang University School of Medicine, Hangzhou, Zhejiang, China.

<sup>b</sup> Department of Oncology, The First Affiliated Hospital, College of Clinical Medicine, Henan University of Science and Technology, Luoyang, Henan, China.

<sup>c</sup> Division of Hepatobiliary and Pancreatic Surgery, Department of Surgery, The First Affiliated Hospital, Zhejiang University School of Medicine, Hangzhou, Zhejiang, China.

† These authors contributed equally to this work: Chen Xue, Xinyu Gu, and Qingmiao Shi.

#### **\*Corresponding author**

**Lanjuan Li & Juan Lu,**

State Key Laboratory for Diagnosis and Treatment of Infectious Diseases, The First Affiliated Hospital, Zhejiang University School of Medicine, Hangzhou, Zhejiang, China. Tel: 86 0571-87236459; Email: ljli@zju.edu.cn (Lanjuan Li), lujuanzju@zju.edu.cn (Juan Lu).

**This file includes:**

Supplementary Figures 1 to 3.

Supplementary Tables 1 to 3.

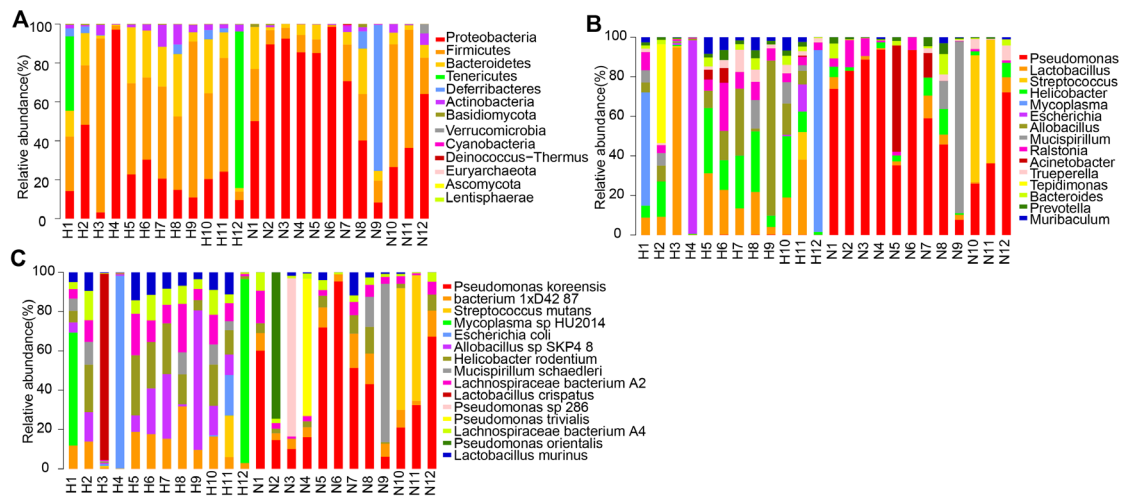

**Figure S1.** Bacterial abundance and distribution in HCC tissues and normal liver tissues from a mouse model. The barplot and heatmap of the top 15 species in abundance are provided based on the taxonomic levels of **(A)** phylum, **(B)** genus, and **(C)** species.

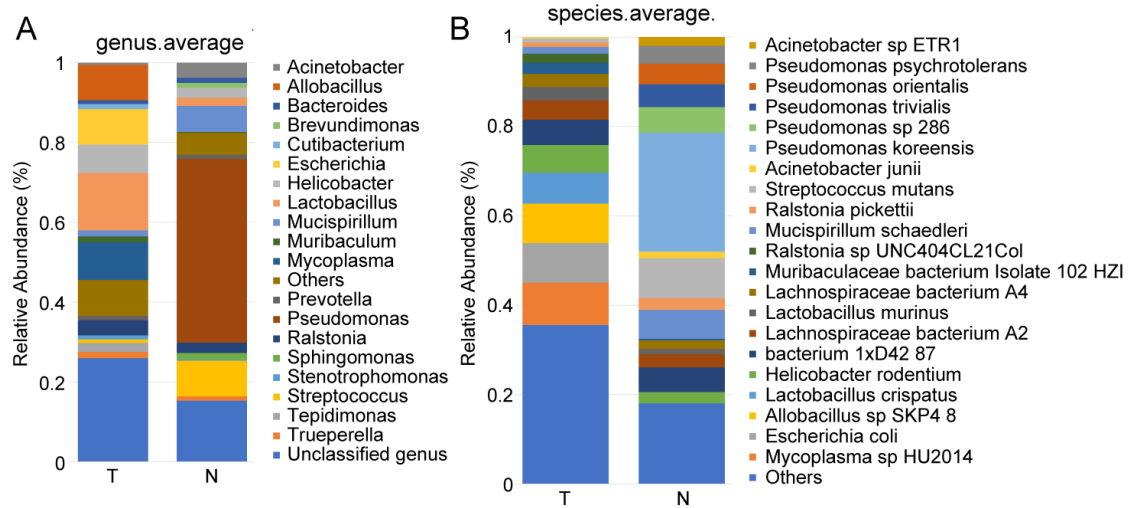

**Figure S2.** Composition and relative abundance of microbiota in HCC tissues versus normal liver tissues. (A) The composition and relative abundance of microbiota at genus level. (B) The composition and relative abundance of microbiota at species level.

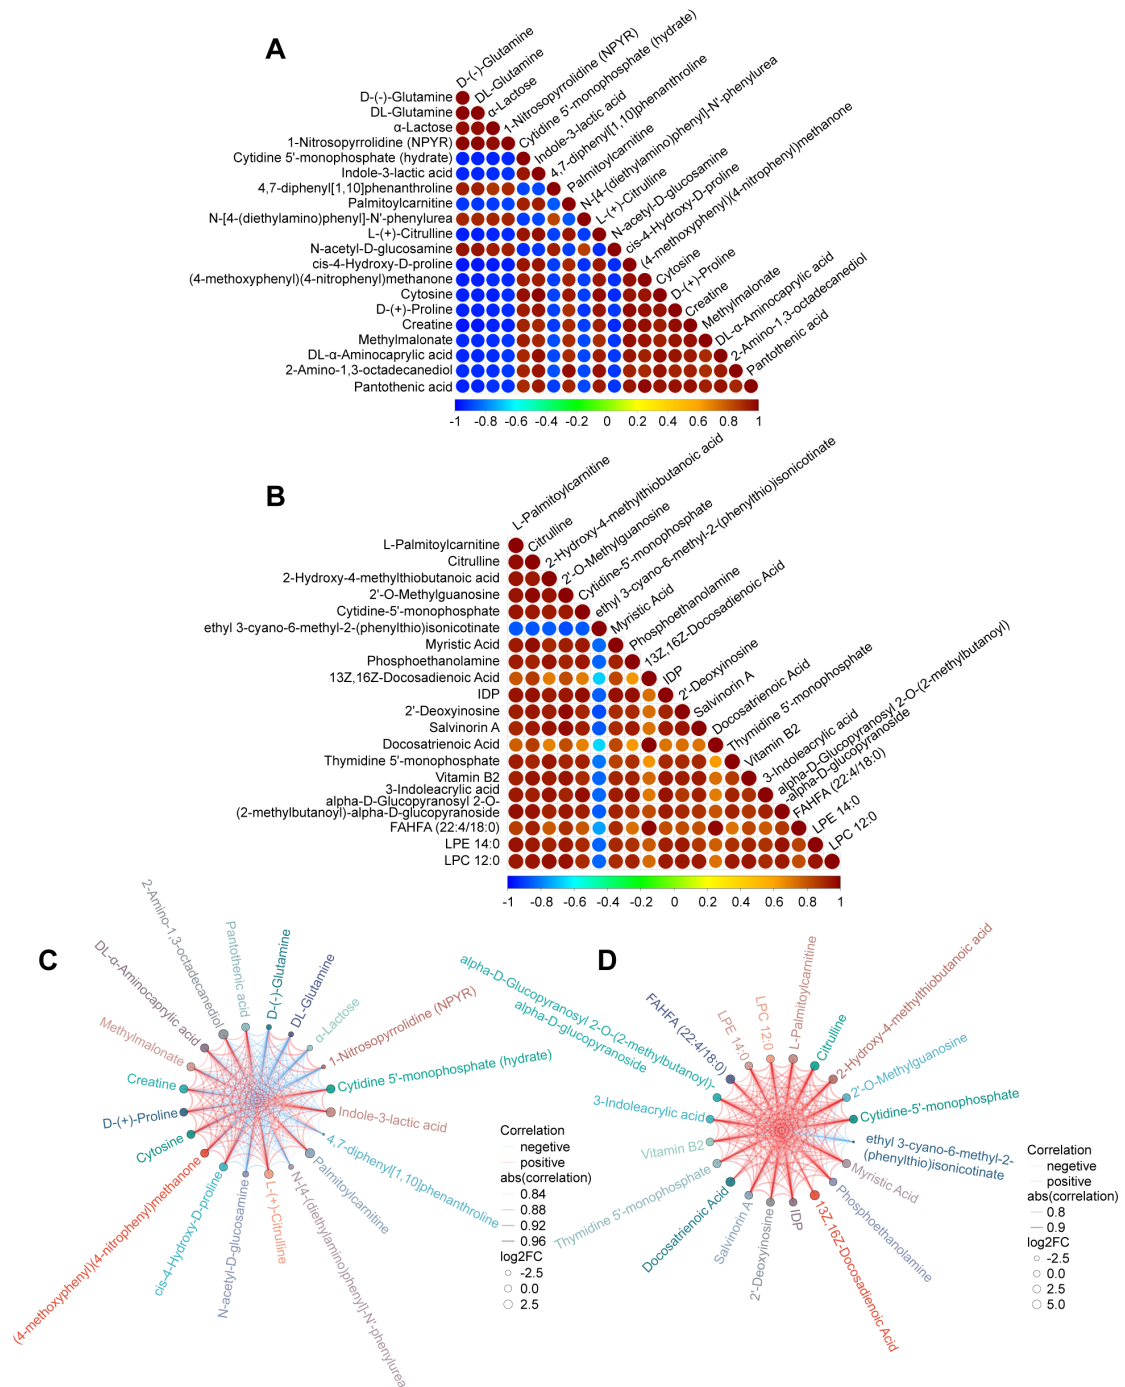

**Figure S3.** Correlation analysis of differential metabolites. **(A-B)** Correlation analysis of differential metabolites based on positive and negative charges. **(C-D)** Chord chart showing the correlation analysis of differential metabolites based on positive and negative charges. The color of the dot represents different metabolites, the size of the dot represents the size of the log<sub>2</sub> fold change, the thickness of the line between metabolites represents the correlation between two metabolites, the blue line represents the negative correlation, and the red line represents the positive correlation.

Table S1. The main composition and relative abundance of microbiota at phylum level in HCC and normal liver tissues

| phylum              | HCC tissues | normal liver tissues | P        | FDR_P    |
|---------------------|-------------|----------------------|----------|----------|
| Firmicutes          | 0.395858    | 0.196971             | 0.040676 | 0.186699 |
| Proteobacteria      | 0.249124    | 0.586587             | 0.005515 | 0.077209 |
| Bacteroidetes       | 0.14002     | 0.067742             | 0.053343 | 0.186699 |
| Tenericutes         | 0.094413    | 0                    | 0.185106 | 0.450324 |
| Unclassified_phylum | 0.068173    | 0.062844             | 0.723881 | 0.723881 |
| Actinobacteria      | 0.03499     | 0.013702             | 0.052952 | 0.186699 |
| Deferribacteres     | 0.01508     | 0.064962             | 0.401332 | 0.468221 |
| Others              | 0.002342    | 7.19E-03             |          |          |

Table S2. The main composition and relative abundance of microbiota at genus level in HCC and normal liver tissues

| genus              | HCC tissues | normal liver tissues | P        | FDR_P    |
|--------------------|-------------|----------------------|----------|----------|
| Unclassified_genus | 0.259563    | 0.152818             | 0.071313 | 0.398836 |
| Trueperella        | 0.015913    | 0.011319             | 0.504598 | 0.546648 |
| Tepidimonas        | 0.022314    | 0                    | 0.325356 | 0.398836 |
| Streptococcus      | 0.008737    | 0.08938              | 0.20008  | 0.398836 |
| Stenotrophomonas   | 0.010275    | 0.002346             | 0.033318 | 0.374519 |
| Sphingomonas       | 7.70E-05    | 0.016565             | 6.04E-05 | 0.003141 |
| Ralstonia          | 0.037837    | 0.02623              | 0.453024 | 0.501218 |
| Pseudomonas        | 0.000523    | 0.460531             | 4.43E-06 | 0.000461 |
| Prevotella         | 0.010342    | 0.010288             | 0.989154 | 0.989154 |
| Others             | 0.09        | 0.05451              |          |          |
| Mycoplasma         | 0.094413    | 0                    | 0.185106 | 0.398836 |
| Muribaculum        | 0.014605    | 0.002711             | 0.009749 | 0.170644 |
| Mucispirillum      | 0.01508     | 0.064962             | 0.401332 | 0.458666 |
| Lactobacillus      | 0.144187    | 0.020955             | 0.083063 | 0.398836 |
| Helicobacter       | 0.071194    | 0.024908             | 0.009845 | 0.170644 |
| Escherichia        | 0.088782    | 0                    | 0.275542 | 0.398836 |
| Cutibacterium      | 0.012182    | 0                    | 0.028464 | 0.370038 |
| Brevundimonas      | 0.000774    | 0.011827             | 0.286545 | 0.398836 |
| Bacteroides        | 0.009289    | 0.012991             | 0.526958 | 0.55922  |
| Allobacillus       | 0.088561    | 0                    | 0.061257 | 0.398836 |
| Acinetobacter      | 0.00589     | 0.037658             | 0.315088 | 0.398836 |

Table S3. The main composition and relative abundance of microbiota at species level in HCC and normal liver tissues

| species                                  | HCC<br>tissues | normal<br>liver<br>tissues | P        | FDR_P    |
|------------------------------------------|----------------|----------------------------|----------|----------|
| Others                                   | 3.56E-01       | 0.180823                   |          |          |
| Mycoplasma_sp_HU2014                     | 0.094413       | 0                          | 0.185106 | 0.3764   |
| Escherichia_coli                         | 0.088782       | 0                          | 0.275542 | 0.3764   |
| Allobacillus_sp_SKP4_8                   | 0.088561       | 0                          | 0.061257 | 0.3764   |
| Lactobacillus_crispatus                  | 0.069079       | 0                          | 0.328183 | 0.3764   |
| Helicobacter_rodentium                   | 0.06183        | 0.024908                   | 0.025918 | 0.3764   |
| bacterium_1xD42_87                       | 0.056567       | 0.055494                   | 0.937083 | 0.952832 |
| Lachnospiraceae_bacterium_A2             | 0.043244       | 0.029465                   | 0.252481 | 0.3764   |
| Lactobacillus_murinus                    | 0.029902       | 0.011669                   | 0.050983 | 0.3764   |
| Lachnospiraceae_bacterium_A4             | 0.029148       | 0.019244                   | 0.14294  | 0.3764   |
| Muribaculaceae_bacterium_Isolate_102_HZI | 0.024988       | 0.003412                   | 0.003    | 0.120991 |
| Ralstonia_sp_UNC404CL21Col               | 0.020552       | 0                          | 0.001059 | 0.095398 |
| Mucispirillum_schaedleri                 | 0.01508        | 0.064962                   | 0.401332 | 0.437489 |
| Ralstonia_pickettii                      | 0.010295       | 0.02623                    | 0.182312 | 0.3764   |
| Streptococcus_mutans                     | 0.008737       | 0.08938                    | 0.20008  | 0.3764   |
| Acinetobacter_junii                      | 0.002505       | 0.01462                    | 0.246308 | 0.3764   |
| Pseudomonas_koreensis                    | 0              | 0.266033                   | 7.51E-05 | 0.018171 |
| Pseudomonas_sp_286                       | 0              | 0.057293                   | 0.328183 | 0.3764   |
| Pseudomonas_trivialis                    | 0              | 0.051155                   | 0.328183 | 0.3764   |
| Pseudomonas_orientalis                   | 0              | 0.046349                   | 0.328183 | 0.3764   |
| Pseudomonas_psychrotolerans              | 0              | 0.0397                     | 0.001812 | 0.109621 |
| Acinetobacter_sp_ETR1                    | 0              | 0.019262                   | 0.328183 | 0.3764   |
